# Supplementary material
Source: PubMed Central journal article supplement (PMC6648023)

## Supplementary Figures for

### A composite of hyaluronic acid modified graphene oxide and iron oxide nanoparticles for targeted drug delivery and magneto-thermal therapy

Nilkamal Pramanik<sup>1,2</sup>, Santhalakshmi Ranganathan<sup>2</sup>, Sunaina Rao<sup>2</sup>, Kaushik Suneet<sup>1</sup>, Shilpee Jain<sup>1</sup>, Annapoorni Rangarajan<sup>1,2</sup>, Siddharth Jhunjhunwala<sup>1\*</sup>

1 – Centre for BioSystems Science and Engineering, Indian Institute of Science, Bengaluru - 560012

2 – Molecular Reproduction, Development and Genetics, Indian Institute of Science, Bengaluru - 560012

\*siddharth@iisc.ac.in

Centre for BioSystems Science and Engineering, Indian Institute of Science, Bengaluru - 560012

#### Contents

|                           |            |
|---------------------------|------------|
| 1. Supplementary Figure 1 | page S – 2 |
| 2. Supplementary Figure 2 | page S – 3 |
| 3. Supplementary Figure 3 | page S – 4 |
| 4. Supplementary Figure 4 | page S – 5 |
| 5. Supplementary Figure 5 | page S – 6 |
| 6. Supplementary Figure 6 | page S – 7 |
| 7. Supplementary Figure 7 | page S – 8 |

**Supplementary Figure 1:** Transmission electron micrographs along with carbon and oxygen elemental mapping of GO and GO-HA. Larger particulates were imaged prior to sonication specifically to showcase that they contain many areas of high transparency suggesting low thickness of the majority of the prepared particulates.

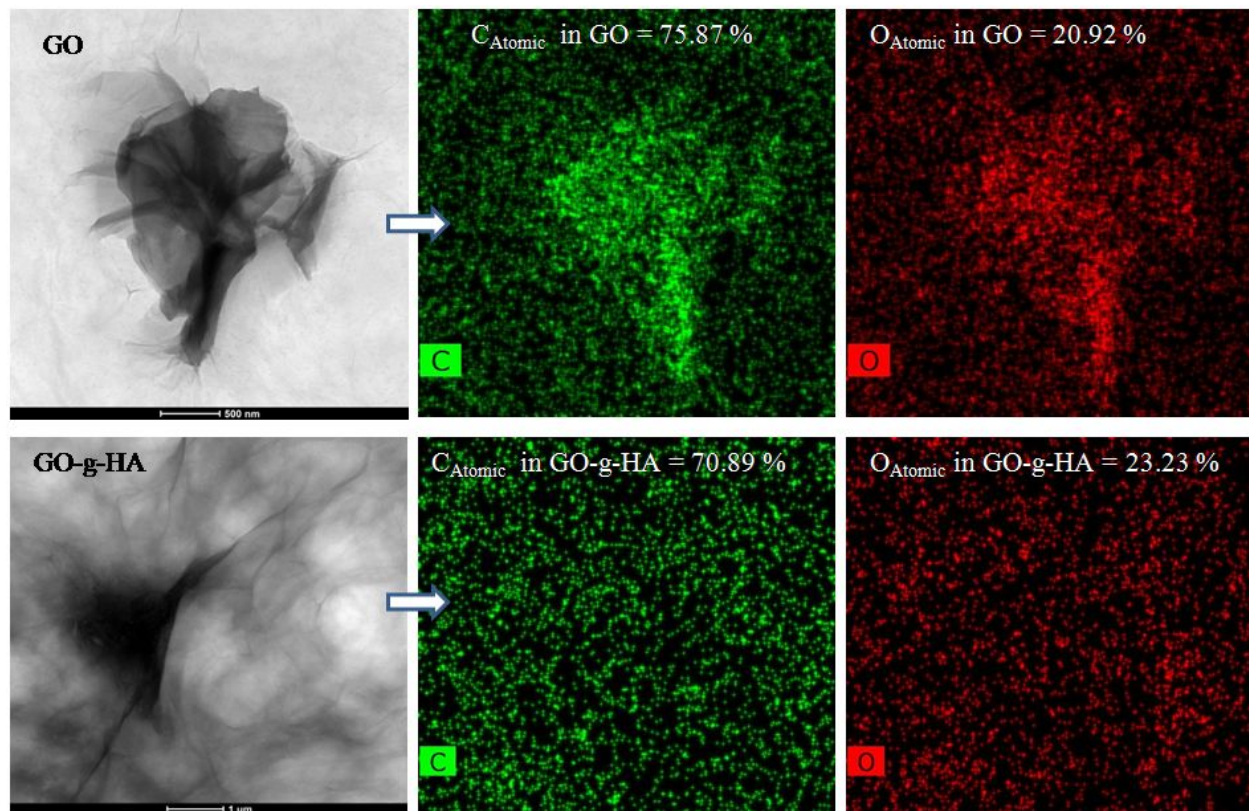

**Supplementary Figure 2:** UV-visible spectroscopy (**Top**) and FTIR spectroscopy (**Bottom**) of doxorubicin (Dox) loaded nano-particulates.

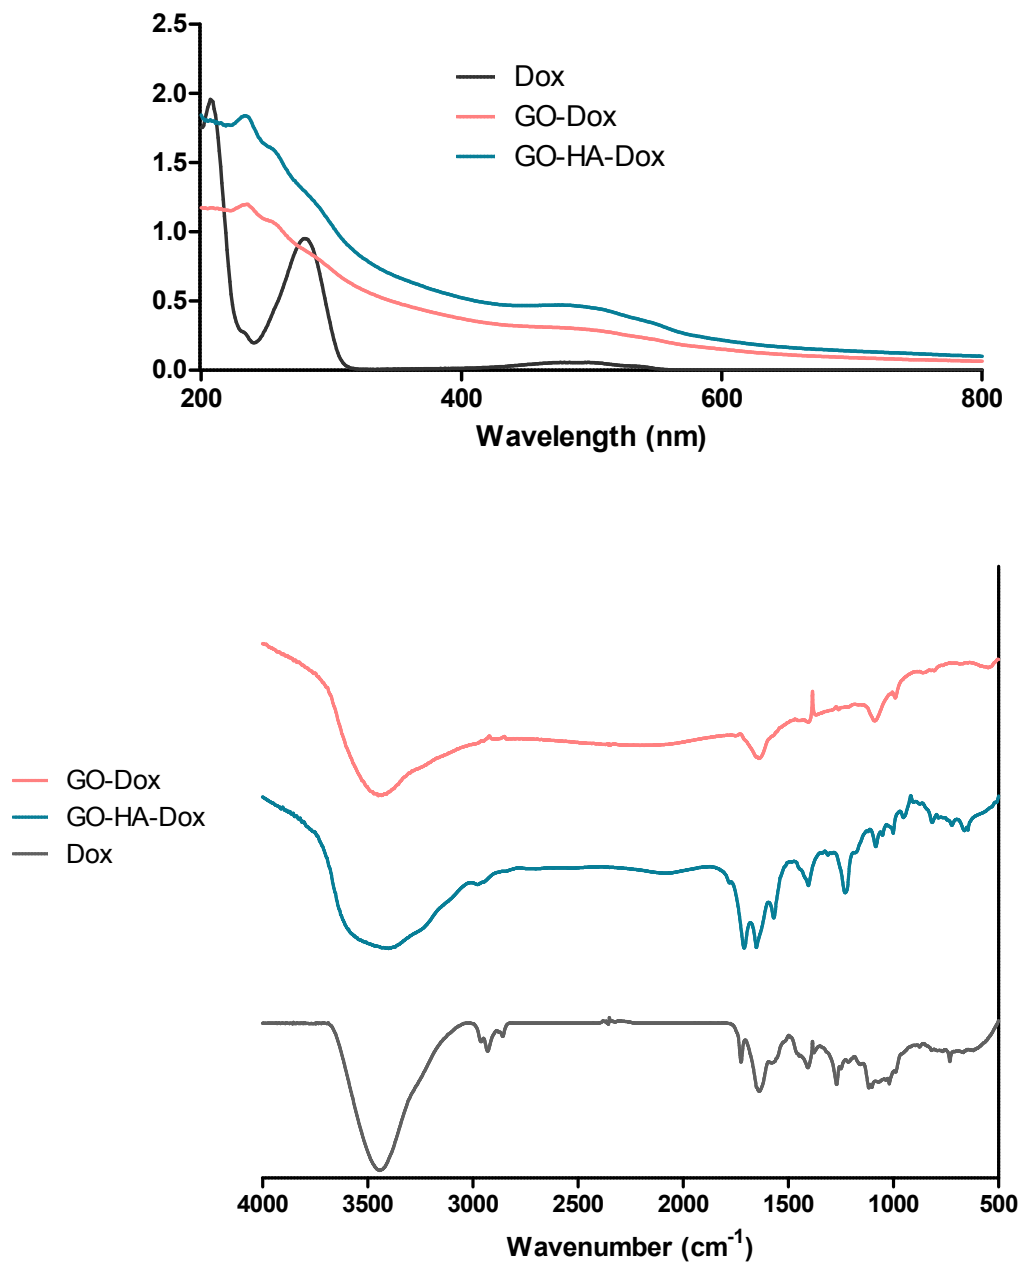

**Supplementary Figure 3:** Fluorescence microscopy to determine uptake of GO and GO-HA by MDA-MB-231 cells. Fluorescein isothiocyanate (FITC) was grafted on to GO or GO-HA, incubated with MDA-MB-231 cells for 24 hours, and then cells were imaged. While some basal level of uptake is observed for GO (FITC grafted), the uptake of GO-HA was much more, which we suggest is due to the HA receptor (CD44) on MDA-MB-231 cells. This uptake data correlated with the killing efficacy of GO-HA-Dox when compared to GO-Dox (data shown in figure 6). Representative images are shown here.

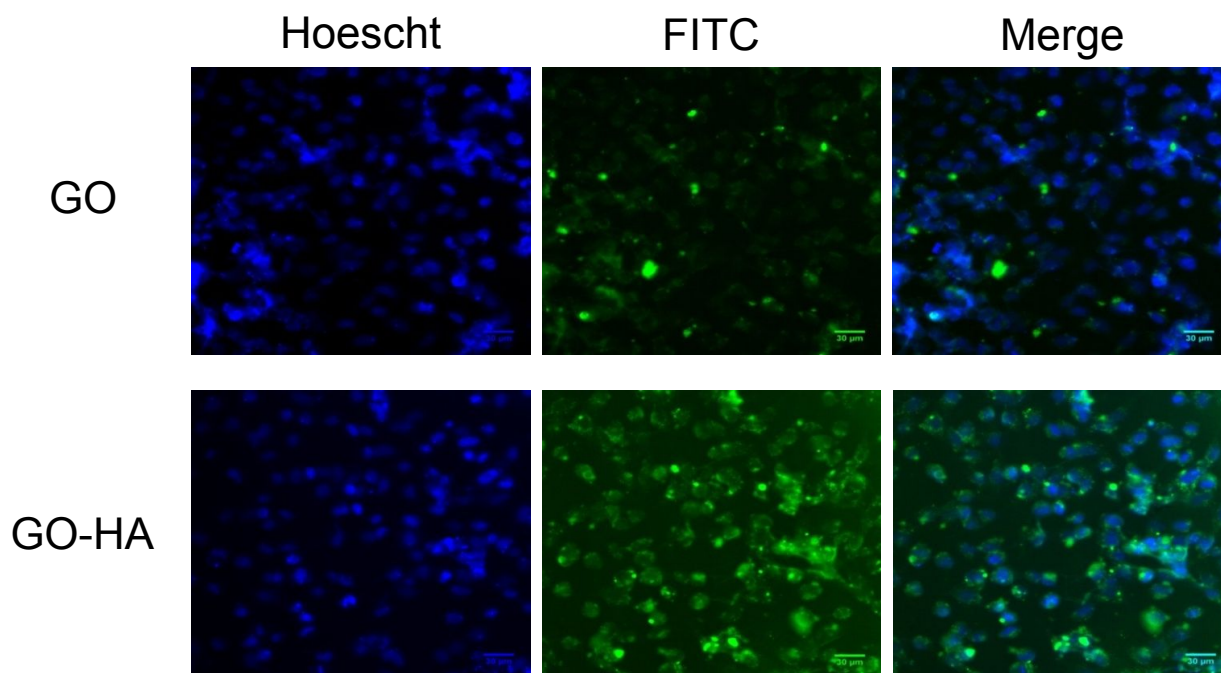

**Supplementary Figure 4:** UV-visible spectroscopy (**Top**) and FTIR spectroscopy (**Bottom**) of paclitaxel (Ptx) loaded nano-particulates.

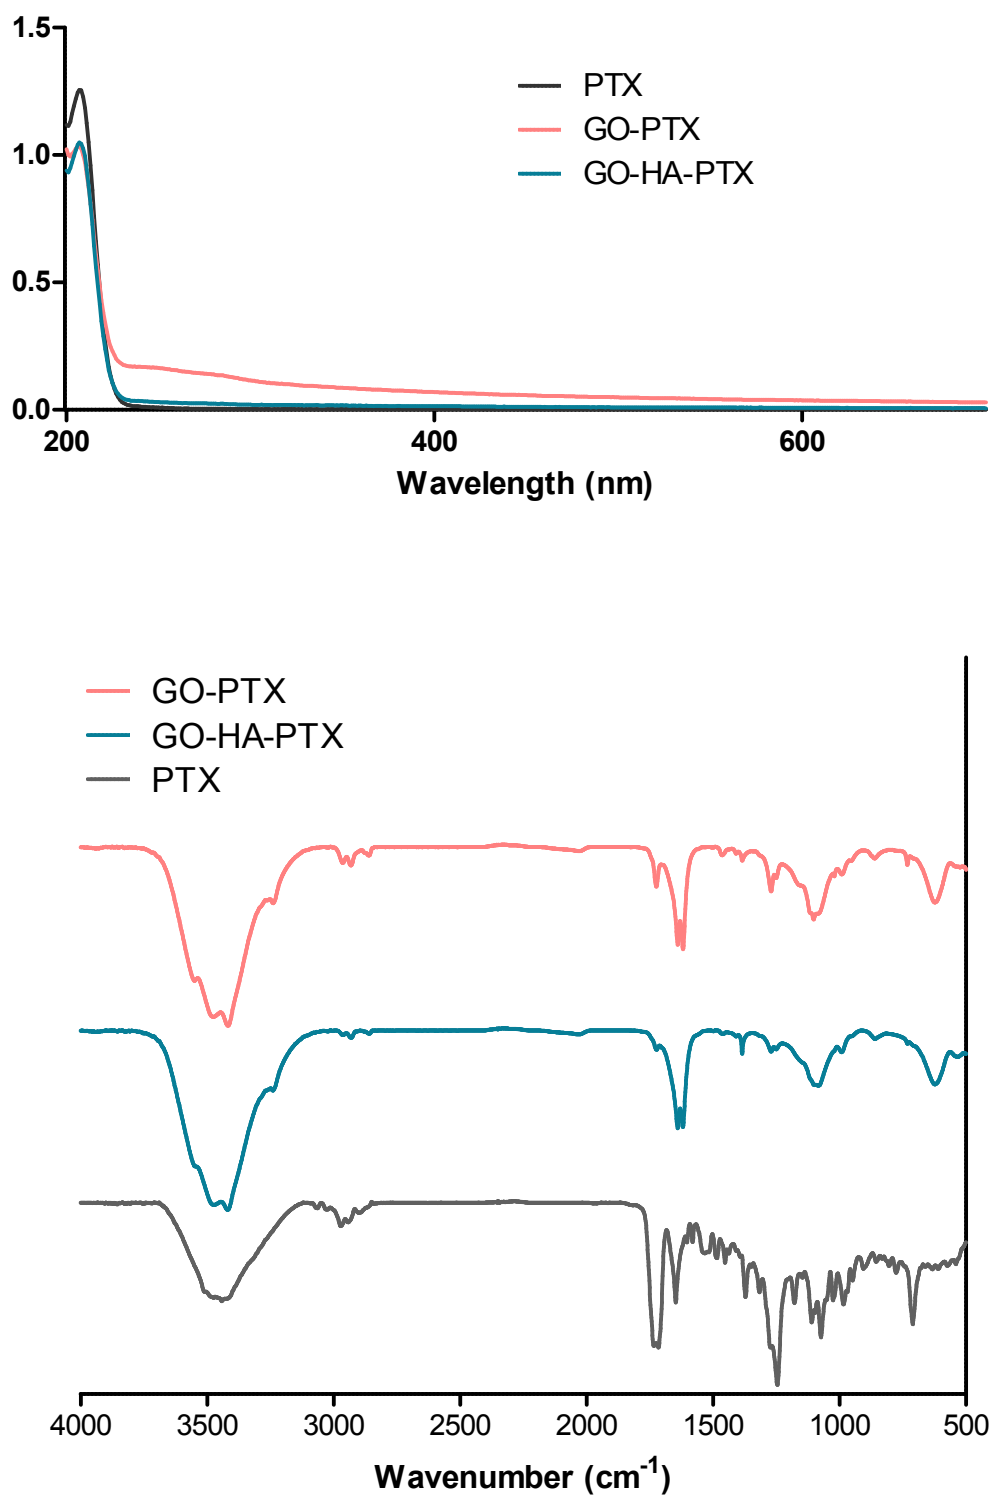

**Supplementary Figure 5:** X-ray photoelectron spectroscopy of the composite along with elemental analysis, confirming iron oxide nanoparticle embedding on GO-HA

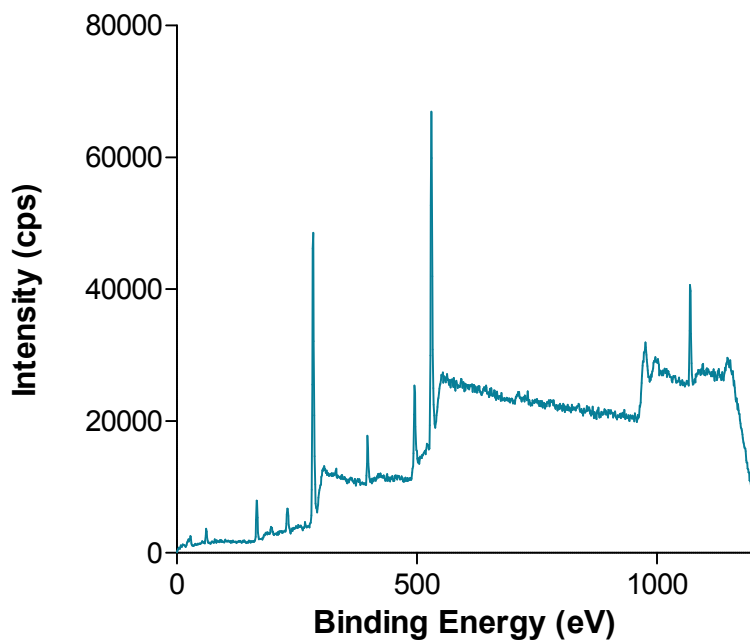

| Peak | Position | Atomic Conc. % | Mass Conc. % |
|------|----------|----------------|--------------|
| C1s  | 283      | 72.81          | 63.89        |
| O1s  | 530      | 21.42          | 25.03        |
| N1s  | 397      | 4.08           | 4.18         |
| Fe2p | 699      | 1.69           | 6.90         |

**Supplementary Figure 6: A** – VSM magnetic hysteresis analysis showing magnetic property of the composite system. **B** – Magnetic hyperthermia measurements showing that subjecting the composite system (at various concentrations) to magnetic fields results in an increase in temperature over time.

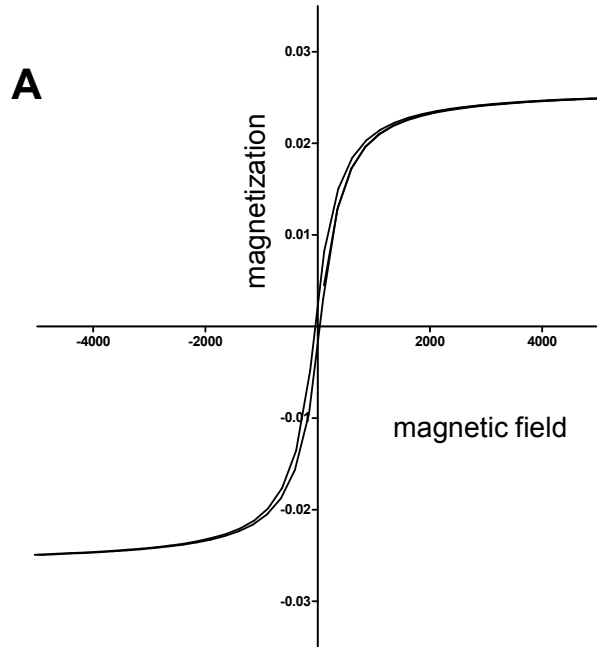

**B**

Kinetics of Temperature Change

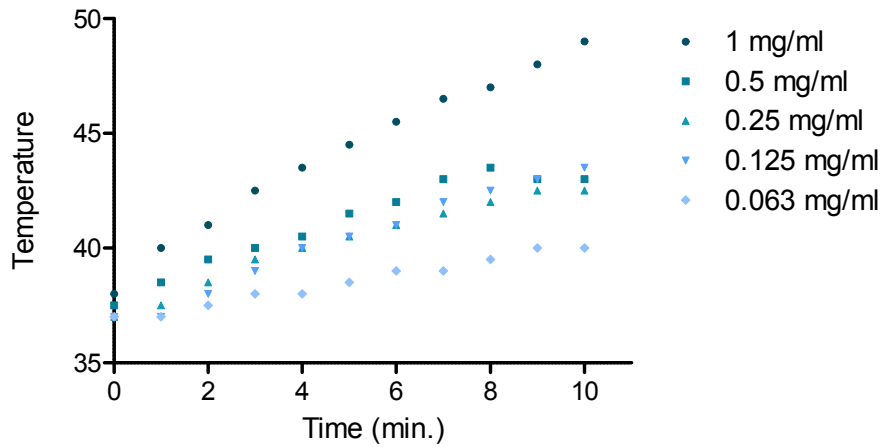

**Supplementary Figure 7:** Raman spectroscopy to assess degradation of nano-particulates when cultured with RAW macrophage cells. **A** – analysis of GO before (a) and after (b – zoomed in) cell treatment. **B** – analysis of GO-HA before and after cell treatment

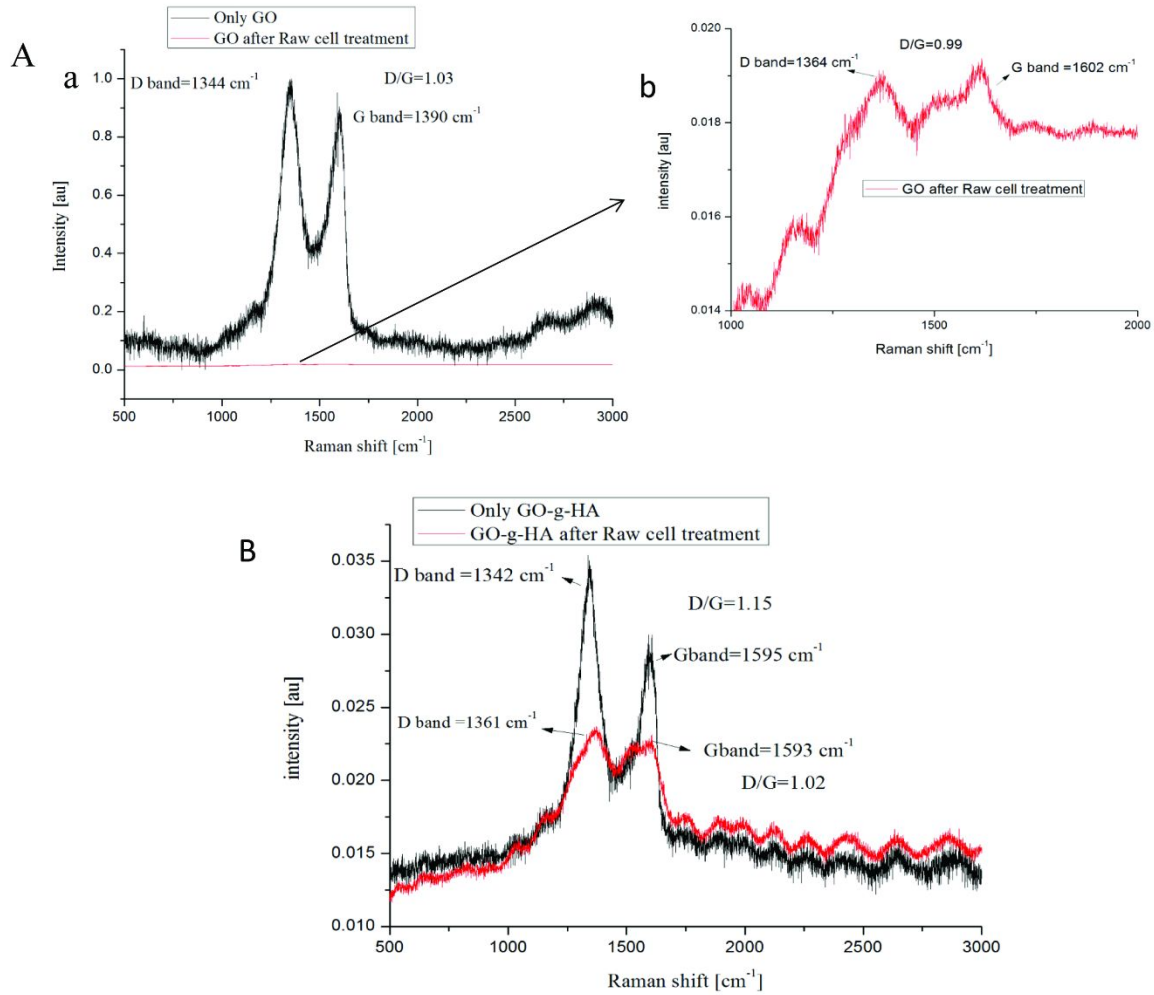

Supplement: ao9b00870_si_001.pdf [file ao9b00870_si_001.pdf]
